# Supplementary material for: Sensitive ADAR editing reporter in cancer cells enables high-throughput screening of small molecule libraries
Source: PubMed Central journal article supplement (PMC6393238; doi:10.1093/nar/gky1228), 2018-12-22
Supplement: gky1228_supplemental_files.pdf [file gky1228_supplemental_files.pdf]

**Table S1**

| Incubation with Nluc reagents | Incubation with FFL reagents | Inhibitor 1 [Z'] | Inhibitor 2 [Z'] |
|-------------------------------|------------------------------|------------------|------------------|
| 10 min                        | 5 min                        | 0.73             | 0.71             |
|                               | 30 min                       | 0.69             | 0.67             |
|                               | 60 min                       | 0.67             | 0.66             |
|                               | 120 min                      | 0.59             | 0.58             |
| 25 min                        | 5 min                        | 0.73             | 0.74             |
|                               | 30 min                       | 0.70             | 0.70             |
|                               | 60 min                       | 0.67             | 0.68             |
|                               | 120 min                      | 0.59             | 0.60             |
| 45 min                        | 5 min                        | 0.61             | 0.61             |
|                               | 30 min                       | 0.56             | 0.57             |
|                               | 60 min                       | 0.54             | 0.55             |
|                               | 120 min                      | 0.48             | 0.49             |
| 90 min                        | 5 min                        | 0.48             | 0.50             |
|                               | 30 min                       | 0.45             | 0.46             |
|                               | 60 min                       | 0.44             | 0.45             |
|                               | 120 min                      | 0.40             | 0.41             |

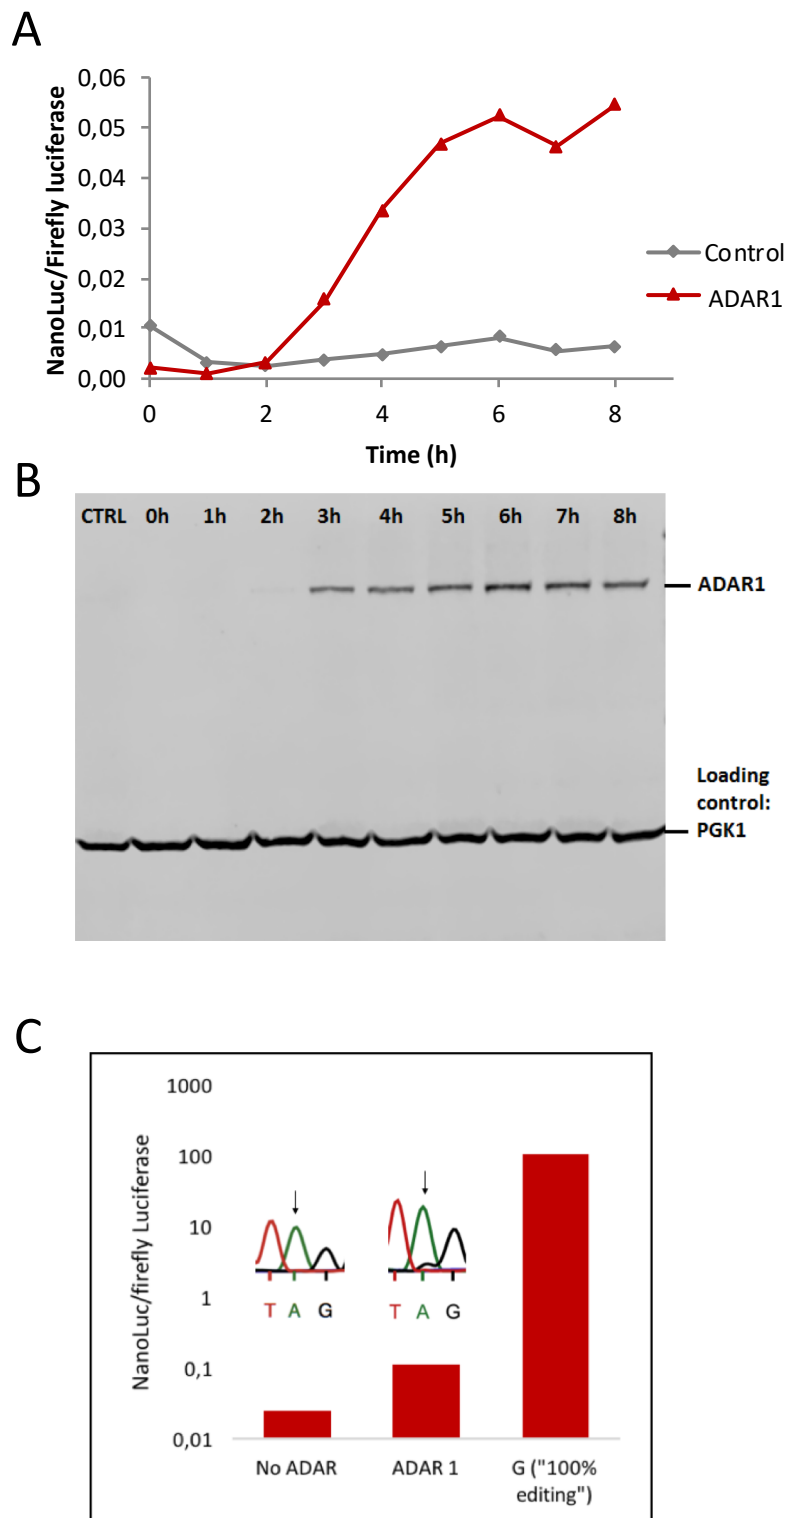

**Supplementary Figure 1:** A-to-I RNA editing reporter in yeast. **(A)** Signal of editing in the reporter in yeast expressing ADAR1 under the inducible GAL1-promoter at different time points after its induction. Editing was determined as the ratio between luminescence from nanoluciferase and firefly luciferase (Nluc/FFL) expressed from the reporter. In comparison, the reporter signal from a control strain lacking ADAR1 is shown. **(B)** Western blot of transiently expressed ADAR1 corresponding to each time point of reporter measurement. Yeast does not express ADAR endogenously. **(C)** The reporter signal with chromatograms from Sanger sequencing showing editing as a dual A/G peak. Editing is low (~10%), but gives a reproducible signal from the reporter. As a control a G was introduced at the editing site, mimicking 100% editing. Note that the scale is logarithmic.

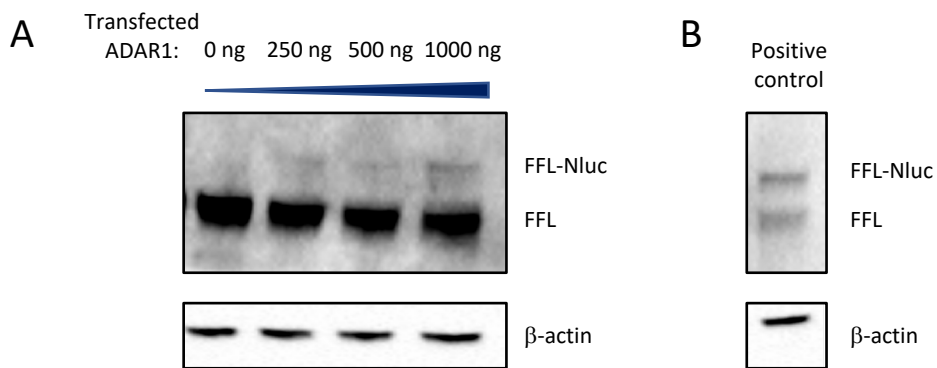

**Supplementary Figure 2:** Western blot showing Firefly luciferase (FFL) both as a single protein (translated from unedited transcripts) and as part of the fusion protein with Nanoluciferase (Nluc) (translated from edited transcripts) in A) Reporter-transfected HEK293 cells cotransfected with ADAR1 and B) HEK293 cells transfected with a reporter construct where the edited stop codon was mutated to a Trp codon (UGG) mimicking 100% editing (positive control).  $\beta$ -actin was used as a loading control.

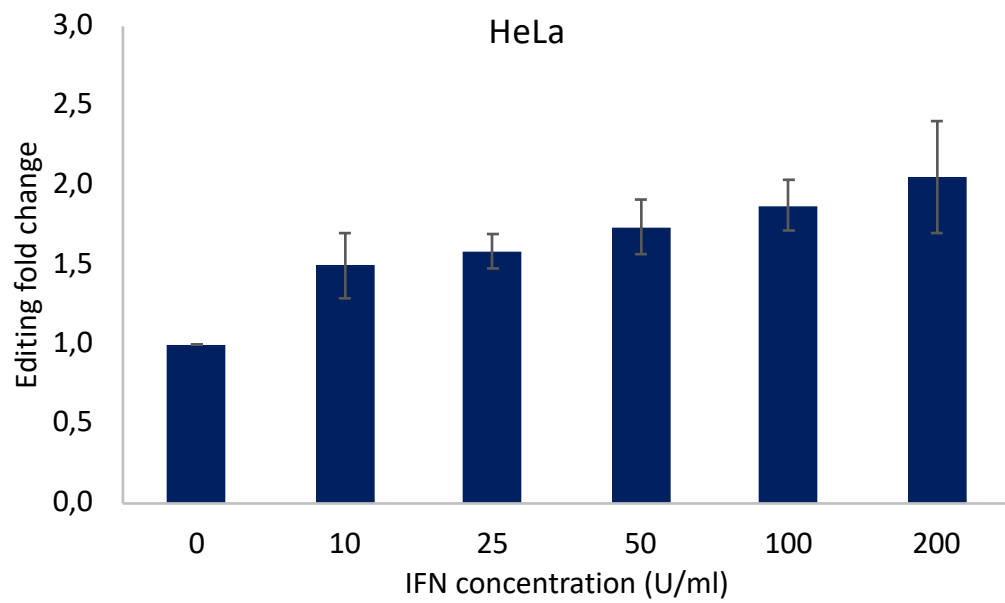

**Supplementary Figure 3:** Editing of the reporter as determined by Sanger sequencing after treatment of HeLa cells, stably expressing the reporter, with different concentrations of interferon- $\alpha$  (IFN). Editing levels were normalized to untreated. Error bars indicate standard deviation (n = 3).

**A**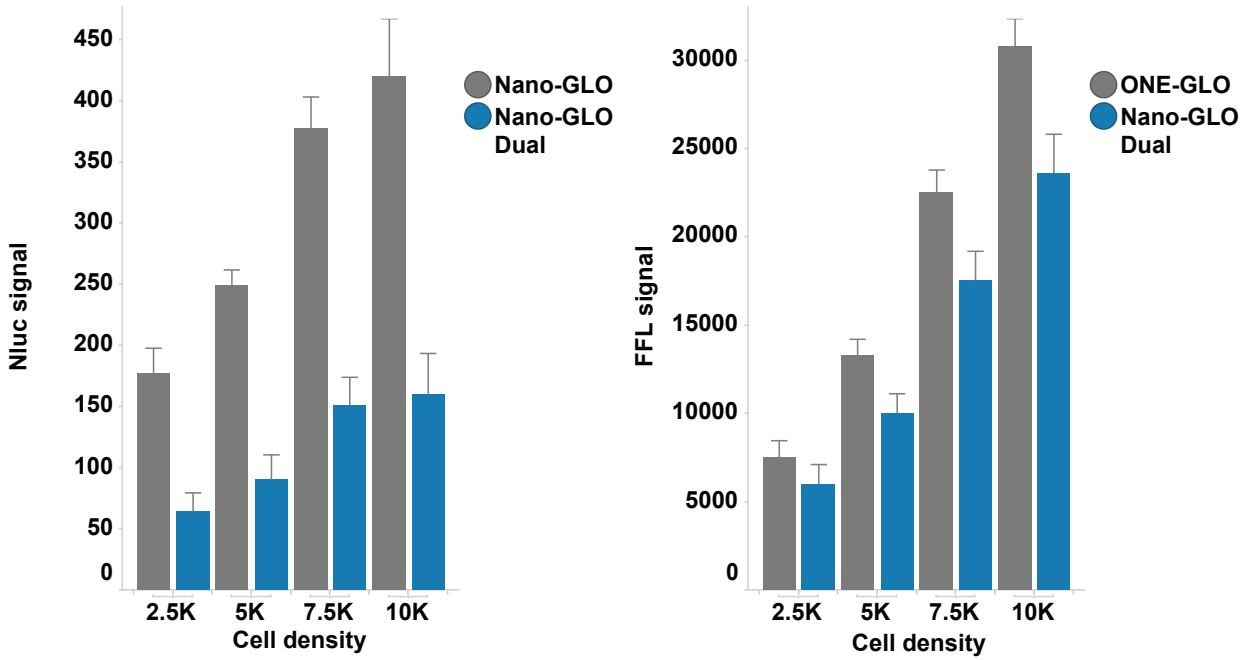**B**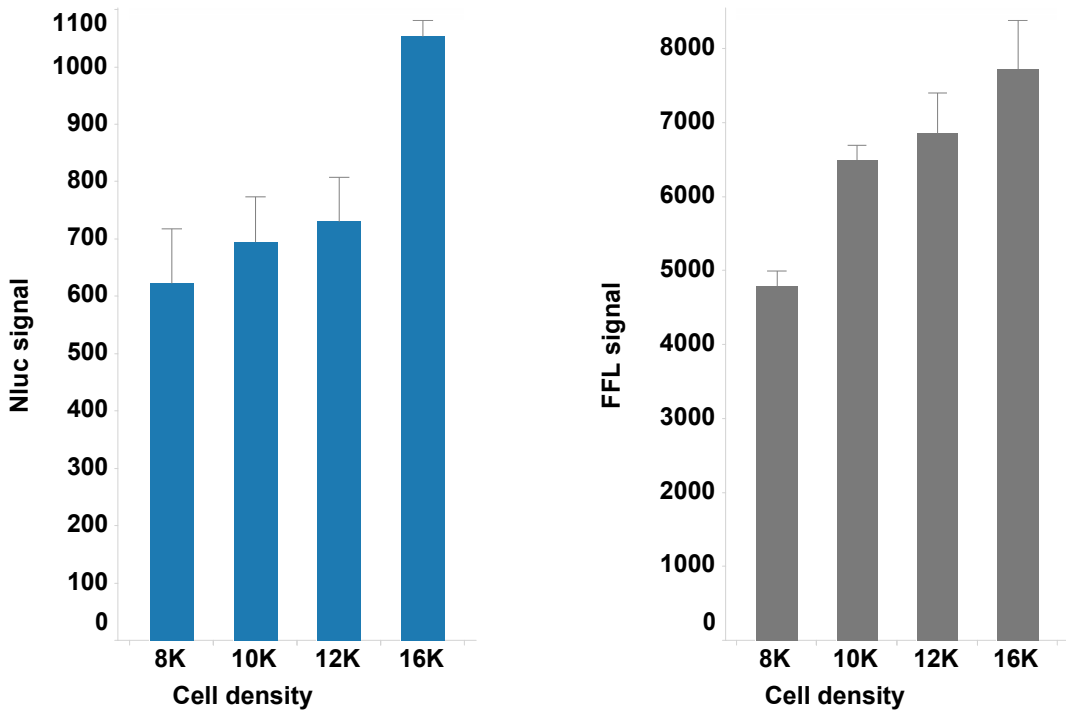

**Supplementary Figure 4:**

Comparison of luminescence signal detection in HeLa-Nluc-edit using Promega (A) and NanoLight Technology (B) kits. A) Nano-Glo ONE-Glo were used to measure signal generated by Nluc and FFL respectively in separated wells, whereas Dual-Glo-Nano detected FFL and subsequently Nluc signal in the same well. B) Nluc luminescence signal was detected using Nluc Assay reagents, followed by measuring of FFL (FFL Assay reagents) activity in the same well. Signals were compared from wells with cells growing at different density. Error bars represent the standard deviation values from 6 replicates.

## ■ Nluc inhibitor 1

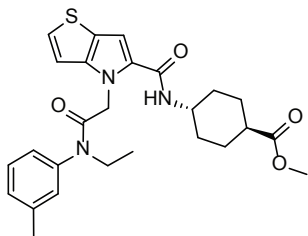

## ■ Nluc inhibitor 2

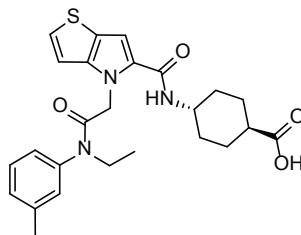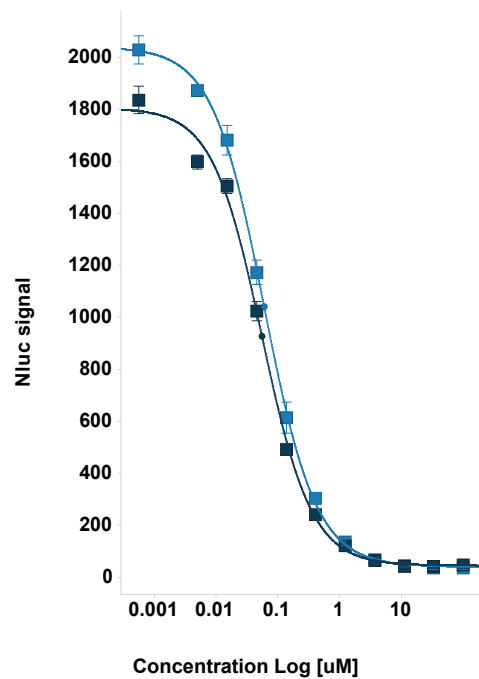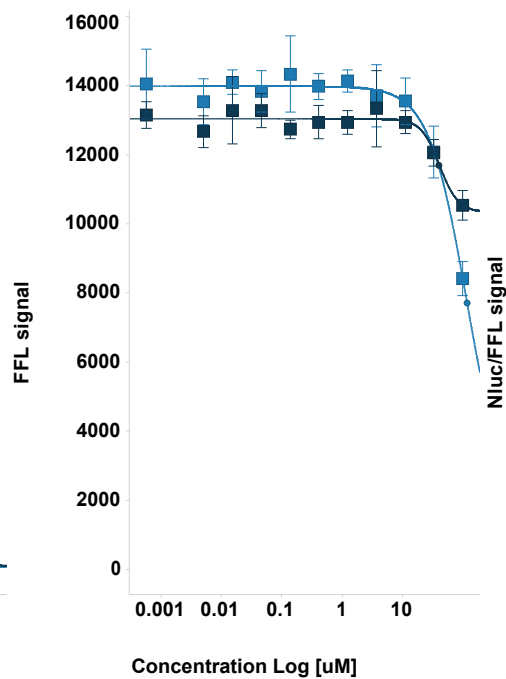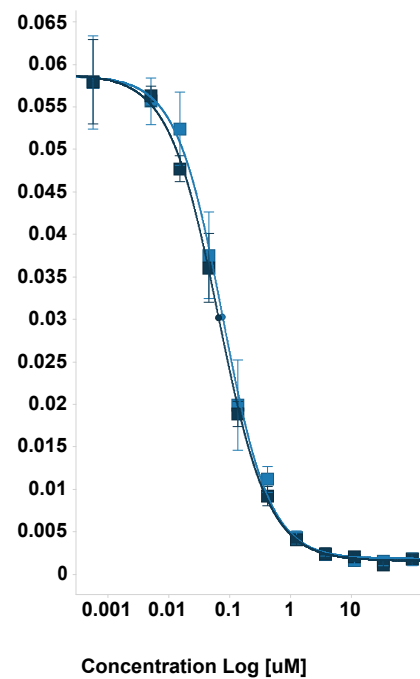

**Supplementary Figure 5:**

Concentration response curves and structures of Nluc inhibitors. HeLa-Nluc-edit cells were treated with the inhibitors for 24h and luminescence signal was detected to calculate Nluc/FFL signal ratio. Error bars represent the standard deviation from three replicates.



**A**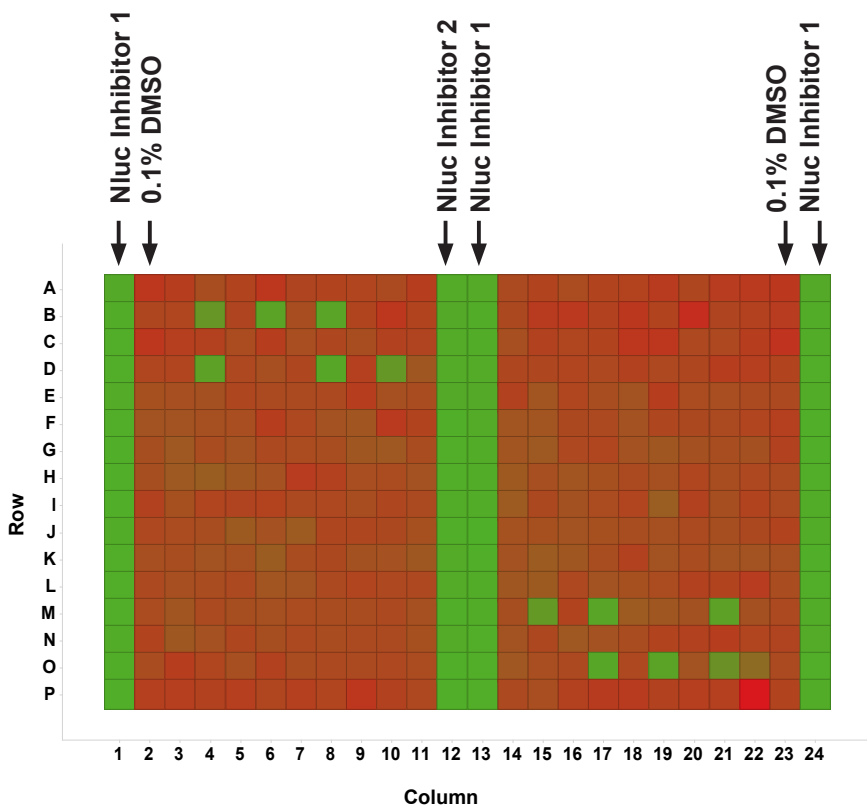**B**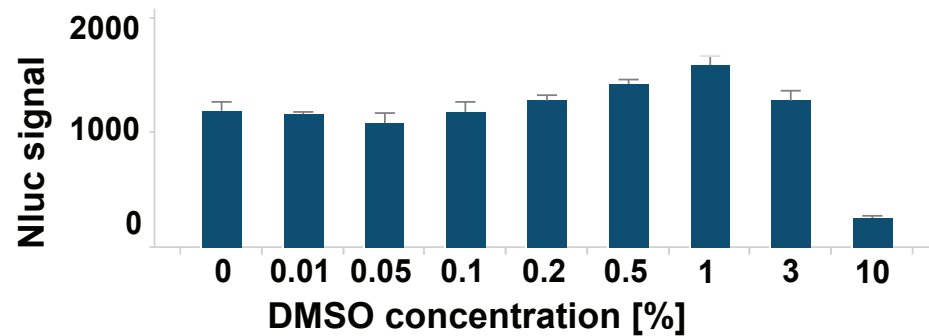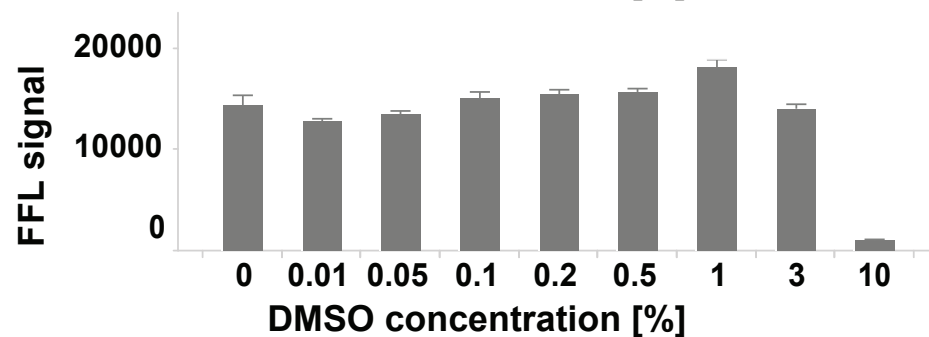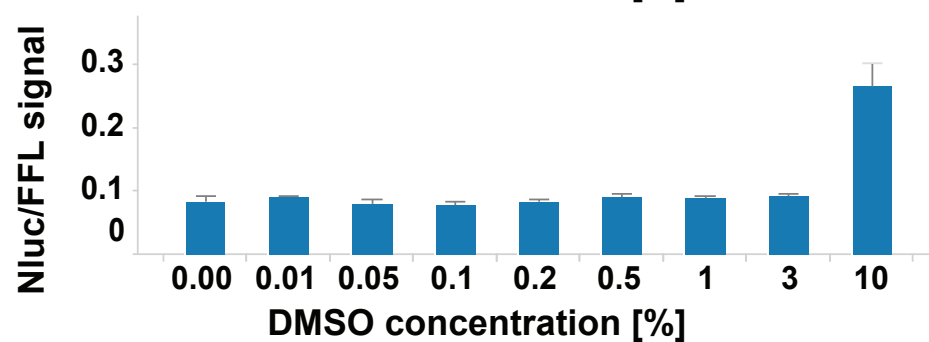

**Supplementary Figure 6:**

Validation of high throughput assay. A) Nluc/FFL signal distribution (lowest - green, highest - red) in plate. Cells in columns 1, 12 and 24 were treated with Nluc inhibitor 1 and in column 13 with Nluc inhibitor 2 at 10  $\mu$ M. Negative control (0.1% DMSO) was placed in columns 2 and 23. In addition inhibitors at 10  $\mu$ M and 1  $\mu$ M were added randomly to different wells on plate edges. B) Results of DMSO tolerance testing.

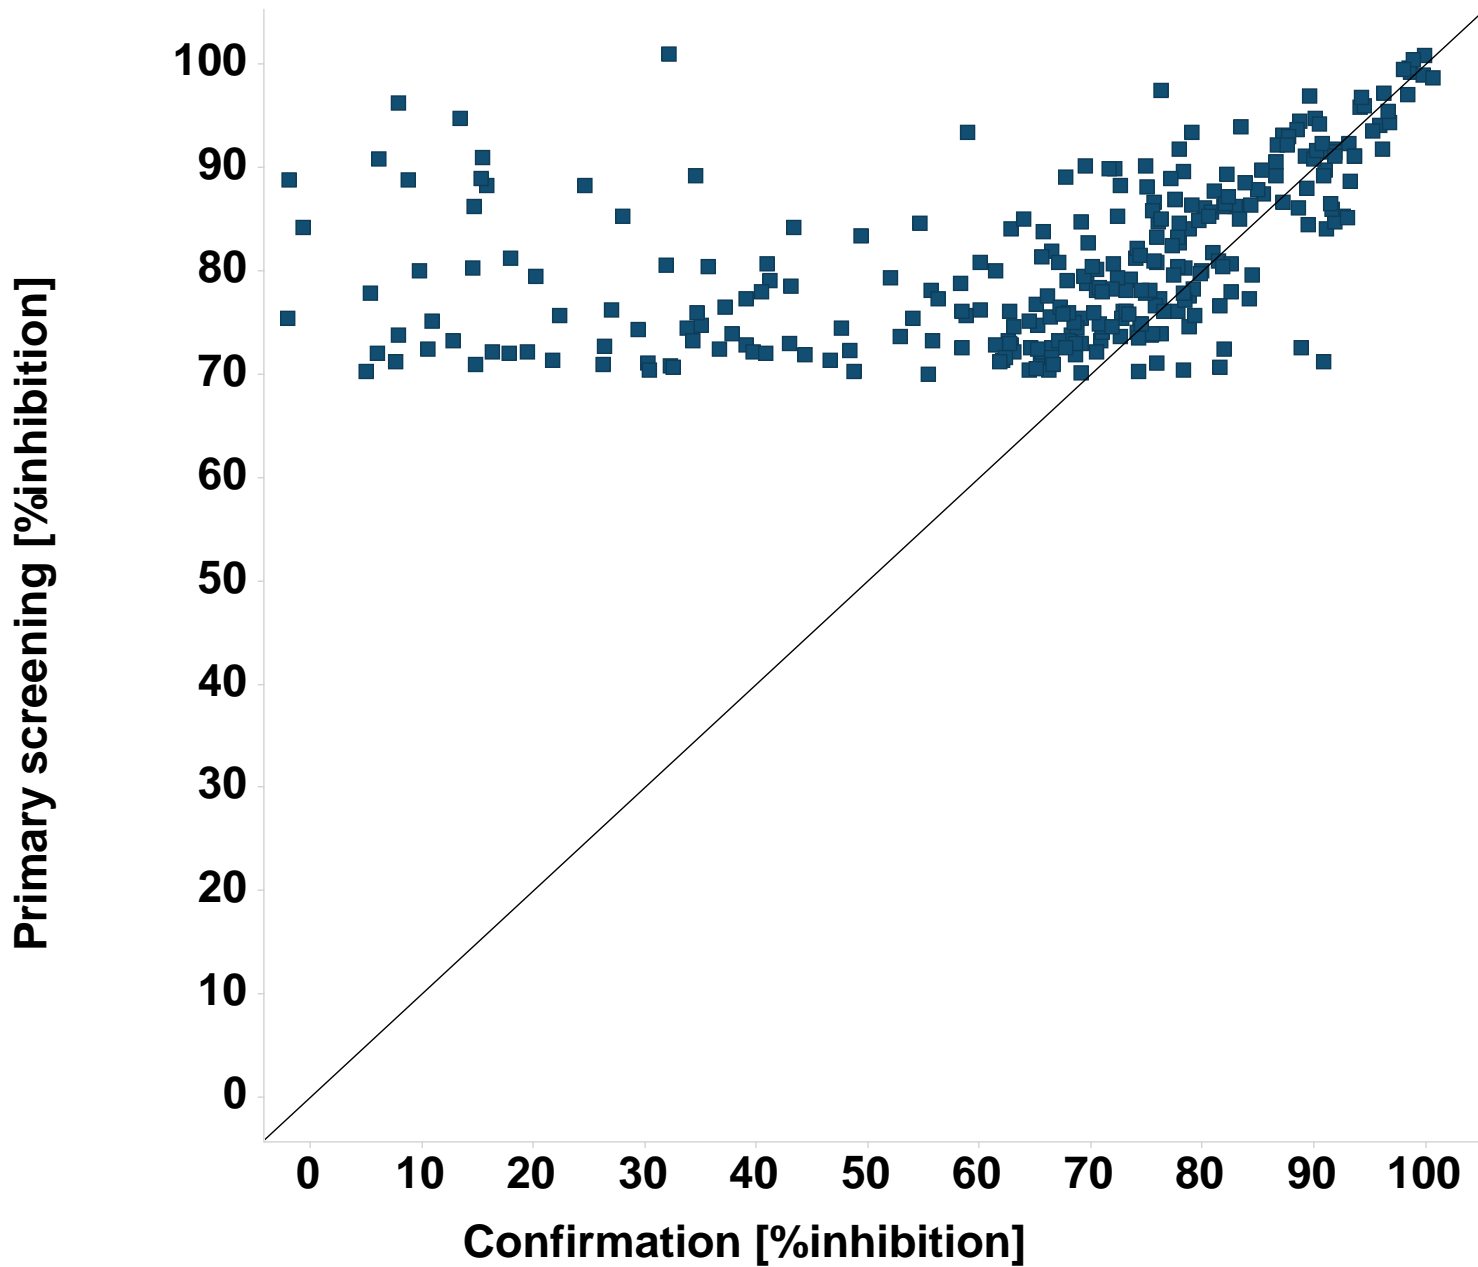

**Supplementary Figure 7:**

Comparison of confirmation (X axis) and primary screening (Y axis) results. Compounds identified as hits in primary screening (% inhibition of Nluc/FFL signal ratio  $\geq 70\%$ ) were retested in independent experiment.
